# Supplementary material for: Design and Volatile Compound Profiling of Starter Cultures for Yogurt Preparation
Source: MDPI journal article supplement (doi:10.3390/foods12020379), 2023-01-13
Supplement: s1 [file s1]

**Table S1.** Concentration of viable cells of *Lactobacillus delbrueckii* subsp. *bulgaricus* and *Streptococcus salivarius* subsp. *thermophilus* and their ratio in yogurts obtained with combination KM1 (log cfu/mL).

|        | After inoculation    |                        | At coagulation       |                        | After 24 h           |                        | Ratio<br>rods : cocci |
|--------|----------------------|------------------------|----------------------|------------------------|----------------------|------------------------|-----------------------|
|        | <i>L. bulgaricus</i> | <i>S. thermophilus</i> | <i>L. bulgaricus</i> | <i>S. thermophilus</i> | <i>L. bulgaricus</i> | <i>S. thermophilus</i> |                       |
| Day 1  | 6.505                | 7.845                  | 8.477                | 9.820                  | 9.778                | 10.176                 | 1:2.5                 |
| Day 2  | 7.799                | 7.869                  | 9.176                | 9.301                  | 9.857                | 10.301                 | 1:2.7                 |
| Day 3  | 7.477                | 7.643                  | 9.255                | 9.342                  | 9.851                | 10.255                 | 1:2.5                 |
| Day 4  | 7.447                | 7.708                  | 9.477                | 9.613                  | 9.863                | 10.301                 | 1:2.7                 |
| Day 14 | 7.342                | 7.602                  | 9.699                | 9.663                  | 9.778                | 10.176                 | 1:2.5                 |
| Day 15 | 7.732                | 7.799                  | 9.415                | 9.708                  | 9.839                | 10.279                 | 1:2.8                 |
| Day 16 | 7.580                | 7.851                  | 9.672                | 9.505                  | 9.875                | 10.301                 | 1:2.6                 |
| Day 17 | 7.833                | 7.919                  | 9.322                | 9.613                  | 9.681                | 10.079                 | 1:2.5                 |

**Table S2.** Titratable acidity and coagulation time of yogurts obtained with combination KM1.

|        | After inoculation | After inoculation | After 24 h | Coagulation time |
|--------|-------------------|-------------------|------------|------------------|
| Day 1  | 27 °T             | 61 °T             | 78 °T      | 3 h 10 min       |
| Day 2  | 22 °T             | 70 °T             | 80 °T      | 3 h              |
| Day 3  | 22 °T             | 70 °T             | 80 °T      | 3 h              |
| Day 4  | 22 °T             | 70 °T             | 81 °T      | 3 h              |
| Day 14 | 22 °T             | 70 °T             | 83 °T      | 3 h 15 min       |
| Day 15 | 20 °T             | 68 °T             | 81 °T      | 3 h              |
| Day 16 | 20 °T             | 70 °T             | 85 °T      | 3 h              |
| Day 17 | 20 °T             | 69 °T             | 84 °T      | 3 h              |

**Table S3.** Concentration of viable cells of *Lactobacillus delbrueckii* subsp. *bulgaricus* and *Streptococcus salivarius* subsp. *thermophilus* and their ratio in yogurts obtained with a combination KM2 (log cfu/mL).

|        | After inoculation    |                        | At coagulation       |                        | After 24 h           |                        | Ratio<br>rods : cocci |
|--------|----------------------|------------------------|----------------------|------------------------|----------------------|------------------------|-----------------------|
|        | <i>L. bulgaricus</i> | <i>S. thermophilus</i> | <i>L. bulgaricus</i> | <i>S. thermophilus</i> | <i>L. bulgaricus</i> | <i>S. thermophilus</i> |                       |
| Day 1  | 4.447                | 7.519                  | 8.623                | 9.613                  | 8.892                | 9.833                  | 1:8.7                 |
| Day 2  | 4.301                | 7.146                  | 8.602                | 9.301                  | 8.857                | 9.813                  | 1:9.0                 |
| Day 3  | 4.544                | 7.531                  | 8.580                | 9.857                  | 8.839                | 9.792                  | 1:8.9                 |
| Day 4  | 5.892                | 7.740                  | 8.602                | 9.544                  | 8.845                | 9.806                  | 1:9.1                 |
| Day 14 | 5.505                | 7.845                  | 8.477                | 9.556                  | 8.903                | 9.833                  | 1:8.5                 |
| Day 15 | 5.799                | 7.869                  | 8.398                | 9.447                  | 8.857                | 9.792                  | 1:8.6                 |
| Day 16 | 5.477                | 7.643                  | 8.447                | 9.342                  | 8.845                | 9.799                  | 1:9.0                 |
| Day 17 | 5.447                | 7.708                  | 8.477                | 9.613                  | 8.875                | 9.820                  | 1:8.8                 |

**Table S4.** Titratable acidity and coagulation time of yogurts obtained with combination KM2.

|        | After inoculation | After inoculation | After 24 h | Coagulation time |
|--------|-------------------|-------------------|------------|------------------|
| Day 1  | 27 °T             | 67 °T             | 87 °T      | 2 h 45 min       |
| Day 2  | 22 °T             | 68 °T             | 88 °T      | 2 h 45 min       |
| Day 3  | 22 °T             | 66 °T             | 87 °T      | 2 h 40 min       |
| Day 4  | 23 °T             | 67 °T             | 87 °T      | 2 h 40 min       |
| Day 14 | 23 °T             | 66 °T             | 88 °T      | 3 h              |
| Day 15 | 20 °T             | 67 °T             | 87 °T      | 2 h 40 min       |
| Day 16 | 20 °T             | 68 °T             | 87 °T      | 2 h 45 min       |
| Day 17 | 20 °T             | 66 °T             | 86 °T      | 2 h 40 min       |

**Table S5.** Concentration of viable cells of *Lactobacillus delbrueckii* subsp. *bulgaricus* and *Streptococcus salivarius* subsp. *thermophilus* and their ratio in yogurts obtained with combination KM3 (log cfu/mL).

|        | After inoculation    |                        | At coagulation       |                        | After 24 h           |                        |                       |
|--------|----------------------|------------------------|----------------------|------------------------|----------------------|------------------------|-----------------------|
|        | <i>L. bulgaricus</i> | <i>S. thermophilus</i> | <i>L. bulgaricus</i> | <i>S. thermophilus</i> | <i>L. bulgaricus</i> | <i>S. thermophilus</i> | Ratio<br>rods : cocci |
| Day 1  | 5.820                | 7.602                  | 7.301                | 9.556                  | 7.477                | 9.653                  | 1:150                 |
| Day 2  | 6.114                | 7.531                  | 8.477                | 9.602                  | 8.857                | 10.176                 | 1:21                  |
| Day 3  | 5.778                | 7.322                  | 8.079                | 9.699                  | 8.362                | 9.914                  | 1:36                  |
| Day 4  | 5.833                | 7.398                  | 8.954                | 9.041                  | 9.362                | 9.519                  | 1:1.4                 |
| Day 14 | 5.342                | 6.845                  | 8.477                | 10.415                 | 9.778                | 10.716                 | 1:8.6                 |
| Day 15 | 5.724                | 7.380                  | 8.255                | 10.301                 | 9.799                | 10.740                 | 1:8.7                 |
| Day 16 | 6.301                | 7.643                  | 8.763                | 10.342                 | 9.778                | 10.716                 | 1:8.6                 |
| Day 17 | 5.833                | 7.708                  | 8.477                | 10.301                 | 9.799                | 10.740                 | 1:8.7                 |

**Table S6.** Titratable acidity and coagulation time of yogurts obtained with combination KM3.

|        | After inoculation | After inoculation | After 24 h | Coagulation time |
|--------|-------------------|-------------------|------------|------------------|
| Day 1  | 27 °T             | 61 °T             | 68 °T      | 3 h 25 min       |
| Day 2  | 21 °T             | 67 °T             | 76 °T      | 3 h 25 min       |
| Day 3  | 22 °T             | 65 °T             | 75 °T      | 3 h 25 min       |
| Day 4  | 23 °T             | 65 °T             | 74 °T      | 3 h 25 min       |
| Day 14 | 22 °T             | 65 °T             | 83 °T      | 3 h              |
| Day 15 | 20 °T             | 65 °T             | 82 °T      | 3 h              |
| Day 16 | 20 °T             | 69 °T             | 84 °T      | 3 h              |
| Day 17 | 20 °T             | 69 °T             | 82 °T      | 3 h              |

**Table S7.** Concentration of viable cells of *Lactobacillus delbrueckii* subsp. *bulgaricus* and *Streptococcus thermophilus* and their ratio in yogurts obtained with combination KM4 (log cfu/mL).

|        | After inoculation    |                        | At coagulation       |                        | After 24 h           |                        |                       |
|--------|----------------------|------------------------|----------------------|------------------------|----------------------|------------------------|-----------------------|
|        | <i>L. bulgaricus</i> | <i>S. thermophilus</i> | <i>L. bulgaricus</i> | <i>S. thermophilus</i> | <i>L. bulgaricus</i> | <i>S. thermophilus</i> | Ratio<br>rods : cocci |
| Day 1  | 6.740                | 6.845                  | 9.845                | 10.342                 | 10.602               | 11.255                 | 1:4.5                 |
| Day 2  | 7.633                | 7.477                  | 9.813                | 10.875                 | 10.623               | 11.301                 | 1:4.7                 |
| Day 3  | 7.301                | 7.531                  | 9.851                | 10.716                 | 10.580               | 11.279                 | 1:5.0                 |
| Day 4  | 7.447                | 7.613                  | 9.919                | 10.613                 | 10.623               | 11.322                 | 1:5.0                 |
| Day 14 | 7.342                | 7.699                  | 10.000               | 10.820                 | 10.591               | 11.279                 | 1:4.8                 |
| Day 15 | 7.633                | 8.380                  | 10.176               | 10.519                 | 10.681               | 11.380                 | 1:5.0                 |
| Day 16 | 7.477                | 8.146                  | 10.255               | 10.342                 | 10.519               | 11.204                 | 1:4.8                 |
| Day 17 | 7.462                | 8.491                  | 10.114               | 10.663                 | 10.633               | 11.322                 | 1:5.0                 |

**Table S8.** Titratable acidity and coagulation time of yogurts obtained with combination KM4.

|        | After inoculation | After inoculation | After 24 h | Coagulation time |
|--------|-------------------|-------------------|------------|------------------|
| Day 1  | 27 °T             | 61 °T             | 79 °T      | 3 h 10 min       |
| Day 2  | 21 °T             | 65 °T             | 80 °T      | 3 h              |
| Day 3  | 22 °T             | 64 °T             | 78 °T      | 3 h              |
| Day 4  | 23 °T             | 64 °T             | 80 °T      | 3 h              |
| Day 14 | 22 °T             | 65 °T             | 79 °T      | 3 h 10 min       |
| Day 15 | 20 °T             | 64 °T             | 78 °T      | 3 h              |
| Day 16 | 20 °T             | 66 °T             | 80 °T      | 3 h              |
| Day 17 | 20 °T             | 66 °T             | 80 °T      | 3 h              |

**Table S9.** Concentration of viable cells of *Lactobacillus delbrueckii* subsp. *bulgaricus* and *Streptococcus salivarius* subsp. *thermophilus* and their ratio in yogurts obtained with combination KM5 (log cfu/mL).

|        | After inoculation    |                        | At coagulation       |                        | After 24 h           |                        |                       |
|--------|----------------------|------------------------|----------------------|------------------------|----------------------|------------------------|-----------------------|
|        | <i>L. bulgaricus</i> | <i>S. thermophilus</i> | <i>L. bulgaricus</i> | <i>S. thermophilus</i> | <i>L. bulgaricus</i> | <i>S. thermophilus</i> | Ratio<br>rods : cocci |
| Day 1  | 4.491                | 6.301                  | 6.301                | 9.204                  | 6.778                | 9.653                  | 1:750                 |
| Day 2  | -                    | 6.778                  | -                    | 8.699                  | -                    | 8.813                  | -                     |
| Day 3  | -                    | 6.146                  | -                    | 8.623                  | -                    | 8.778                  | -                     |
| Day 4  | -                    | 6.785                  | -                    | 8.322                  | -                    | 8.924                  | -                     |
| Day 14 | -                    | 6.491                  | -                    | 9.322                  | -                    | 9.833                  | -                     |
| Day 15 | -                    | 6.447                  | -                    | 9.633                  | -                    | 9.851                  | -                     |
| Day 16 | -                    | 6.748                  | -                    | 9.785                  | -                    | 9.919                  | -                     |
| Day 17 | -                    | 6.663                  | -                    | 9.756                  | -                    | 9.869                  | -                     |

**Table S10.** Titratable acidity and coagulation time of yogurts obtained with combination KM5.

|        | After inoculation | After inoculation | After 24 h        | Coagulation time |
|--------|-------------------|-------------------|-------------------|------------------|
| Day 1  | 27 °T             | 60 °T             | 67 °T             | 5 h 15 min       |
| Day 2  | 20 °T             | 55 °T             | 62 °T             | 6 h 15 min       |
| Day 3  | 20 °T             | 55 °T             | 63 °T             | 6 h 15 min       |
| Day 4  | 20 °T             | 56 °T             | 64 °T             | 6 h 15 min       |
| Day 14 | 21 °T             | 56 °T             | 64 <sup>0</sup> T | 6 h 10 min       |
| Day 15 | 20 °T             | 54 °T             | 63 °T             | 6 h 15 min       |
| Day 16 | 20 °T             | 53 °T             | 64 °T             | 6 h 15 min       |
| Day 17 | 20 °T             | 55 °T             | 64 °T             | 6 h 15 min       |

**Table S11.** Concentration of viable cells of *Lactobacillus delbrueckii* subsp. *bulgaricus* and *Streptococcus salivarius* subsp. *thermophilus* and their ratio in yogurts obtained with combination KM6 (log cfu/mL).

|        | After inoculation    |                        | At coagulation       |                        | After 24 h           |                        |                       |
|--------|----------------------|------------------------|----------------------|------------------------|----------------------|------------------------|-----------------------|
|        | <i>L. bulgaricus</i> | <i>S. thermophilus</i> | <i>L. bulgaricus</i> | <i>S. thermophilus</i> | <i>L. bulgaricus</i> | <i>S. thermophilus</i> | Ratio<br>rods : cocci |
| Day 1  | 5.716                | 6.623                  | 7.079                | 9.204                  | 7.477                | 10.301                 | 1:667                 |
| Day 2  | 4.799                | 7.732                  | 6.740                | 9.301                  | 7.079                | 10.398                 | 1:2038                |
| Day 3  | 5.000                | 6.699                  | 7.255                | 9.079                  | 7.362                | 9.342                  | 1:95.6                |
| Day 4  | 4.892                | 7.041                  | 7.322                | 8.322                  | 7.633                | 8.908                  | 1:18.8                |
| Day 14 | 5.079                | 7.477                  | 7.477                | 10.663                 | 7.778                | 10.875                 | 1:1250                |
| Day 15 | 4.799                | 7.732                  | 6.929                | 10.531                 | 7.623                | 10.653                 | 1:1071                |
| Day 16 | 5.230                | 7.633                  | 7.255                | 10.342                 | 7.724                | 10.544                 | 1:663                 |
| Day 17 | 5.380                | 7.613                  | 7.477                | 10.623                 | 7.633                | 10.785                 | 1:1418                |

**Table S12.** Titratable acidity and coagulation time of yogurts obtained with combination KM6.

|        | After inoculation | After inoculation | After 24 h | Coagulation time |
|--------|-------------------|-------------------|------------|------------------|
| Day 1  | 27 °T             | 62 °T             | 68 °T      | 4 h              |
| Day 2  | 20 °T             | 60 °T             | 70 °T      | 3 h 45 min       |
| Day 3  | 21 °T             | 61 °T             | 70 °T      | 3 h 45 min       |
| Day 4  | 21 °T             | 60 °T             | 71 °T      | 3 h 45 min       |
| Day 14 | 21 °T             | 60 °T             | 74 °T      | 3 h 40 min.      |
| Day 15 | 20 °T             | 61 °T             | 75 °T      | 3 h 45 min       |
| Day 16 | 20 °T             | 62 °T             | 74 °T      | 3 h 40 min       |
| Day 17 | 20 °T             | 62 °T             | 76 °T      | 3 h 45 min       |
